# Supplementary material for: Finding the Appropriate Therapeutic Strategy in Patients with Neuroendocrine Tumors of the Pancreas: Guideline Recommendations Meet the Clinical Reality
Source: MDPI journal article supplement (doi:10.3390/jcm10143023), 2021-07-07
Supplement: s1 [file s1]

### Supplementary Materials:

The survey is attached as supplemental file. We also provide the basis of our statistical assessment as shown in supplemental table S1.

**Supplemental Table S1:** Summary of the case reports.

| Case | Grading | Ki-67 | Therapy line | Comment                                                            |
|------|---------|-------|--------------|--------------------------------------------------------------------|
| C1   | G2      | <5%   | 2nd          | PD under 1 <sup>st</sup> -line SSA, comorbidities                  |
| C2   | G2      | <10%  | 1st          | Asymptomatic, not resectable liver metastases                      |
| C3   | G2      | 8%    | 2nd          | PD under SSA after 12 months                                       |
| C4   | G2      | <10%  | 3rd          | PD after 10 months CTx (last 4 months CTx-free), prior SSA         |
| C5   | G1      | 1%    | 2nd          | PD under 1 <sup>st</sup> -line SSA for 3 years                     |
| C6   | G2      | 15%   | 1st          | Tumor-specific symptoms                                            |
| C7   | G2      | 15%   | 2nd          | PD under 1 <sup>st</sup> -line CTx, primary resected               |
| C8   | G2      | 20%   | 1st          | Liver only metastasized, primary tumor in the tail of the pancreas |
| C9   | G2      | 5%    | 3rd          | PD under PRRT (4 cycles) after 1 year, prior SSA                   |
| C10  | G1      | 1%    | curative     | 3cm in size, no growth dynamic, no metastasis                      |
| C11  | G2      | 5%    | curative     | 3cm pancreatic primary; single liver metastasis (4 cm)             |
| C12  | G2      | 20%   | 2nd          | PD under CTx, tumor specific symptoms, liver only disease          |
| C13  | G3      | 35%   | 2nd          | CTx not tolerated and PD after 8 weeks                             |
| C14  | G2      | 15%   | 1st          | Declines CTx, elevated liver enzymes                               |

PD, progressive disease; CTx, chemotherapy; PRRT, peptide receptor radionuclide therapy; SSA, somatostatin analogues.

Supplemental Table S2: Subgroup analysis based on the different disciplines participating.

|                                | G1/2 Ki-67 <10% |      |    |     |    |     |    |     | G2 Ki-67 >10% |     |     |     |     |     | G3 |     |
|--------------------------------|-----------------|------|----|-----|----|-----|----|-----|---------------|-----|-----|-----|-----|-----|----|-----|
|                                | C2              | C1   | C3 | C5  | C4 | C9  |    |     | C6            | C8  | C14 | C7  | C12 | C13 |    |     |
|                                | n               | %    | n  | %   | n  | %   | n  | %   | n             | %   | n   | %   | n   | %   | n  | %   |
| <b>Endocrinology (n=18)</b>    |                 |      |    |     |    |     |    |     |               |     |     |     |     |     |    |     |
| SSA                            | 13              | 72%  |    |     | 3  | 17% |    |     | 1             | 6%  | 1   | 6%  | 3   | 17% | 1  | 6%  |
| PRRT                           | 1               | 6%   | 13 | 72% | 9  | 50% | 10 | 56% | 2             | 11% | 1   | 6%  | 11  | 61% | 9  | 50% |
| Chemotherapy                   | 1               | 6%   | 4  | 22% | 8  | 44% |    |     | 1             | 6%  | 5   | 28% |     |     | 3  | 17% |
| TKI                            |                 |      | 1  | 6%  | 1  | 6%  |    |     | 2             | 11% | 8   | 44% |     |     | 1  | 6%  |
| TACE/SIRT                      |                 |      |    |     | 3  | 17% | 4  | 22% |               |     |     |     | 2   | 11% |    |     |
| Resection                      |                 |      |    |     |    |     |    |     |               |     |     |     |     |     |    |     |
| OTH                            | 3               | 17%  |    |     | 1  | 6%  | 1  | 6%  | 1             | 6%  | 1   | 6%  |     |     | 1  | 6%  |
| <b>Gastroenterology (n=13)</b> |                 |      |    |     |    |     |    |     |               |     |     |     |     |     |    |     |
| SSA                            | 10              | 77%  |    |     | 1  | 8%  |    |     |               |     |     |     | 1   | 8%  |    |     |
| PRRT                           |                 |      | 6  | 46% | 2  | 15% | 6  | 46% | 2             | 15% | 1   | 8%  |     |     | 3  | 23% |
| Chemotherapy                   | 1               | 8%   | 2  | 15% | 7  | 54% | 1  | 8%  | 8             | 62% | 7   | 54% |     |     | 9  | 69% |
| TKI                            |                 |      | 2  | 15% | 2  | 15% | 1  | 8%  | 1             | 8%  | 4   | 31% | 1   | 8%  |    |     |
| TACE/SIRT                      | 1               | 8%   |    |     |    |     | 4  | 31% | 1             | 8%  |     |     |     |     |    |     |
| Resection                      |                 |      |    |     |    |     |    |     |               |     |     |     | 3   | 23% |    |     |
| OTH                            | 1               | 8%   | 3  | 23% | 1  | 8%  | 1  | 8%  | 1             | 8%  | 1   | 8%  | 2   | 15% | 1  | 8%  |
| <b>Nuclear medicine (n=20)</b> |                 |      |    |     |    |     |    |     |               |     |     |     |     |     |    |     |
| SSA                            | 14              | 70%  |    |     | 3  | 15% |    |     | 3             | 15% | 1   | 5%  | 1   | 5%  |    |     |
| PRRT                           | 1               | 5%   | 16 | 80% | 13 | 65% | 12 | 60% | 13            | 65% | 1   | 5%  | 3   | 15% | 10 | 50% |
| Chemotherapy                   | 1               | 5%   | 2  | 10% | 5  | 25% |    |     | 9             | 45% | 7   | 35% | 1   | 5%  | 3  | 15% |
| TKI                            |                 |      | 1  | 5%  | 1  | 5%  |    |     | 1             | 5%  |     |     | 1   | 5%  | 3  | 15% |
| TACE/SIRT                      |                 |      |    |     | 4  | 20% | 2  | 10% |               |     |     |     |     |     | 10 | 50% |
| Resection                      |                 |      |    |     |    |     |    |     | 2             | 10% | 5   | 25% |     |     |    |     |
| OTH                            | 4               | 20%  | 1  | 5%  | 1  | 5%  | 1  | 5%  | 2             | 10% | 2   | 10% | 1   | 5%  | 1  | 5%  |
| <b>Oncology (n=16)</b>         |                 |      |    |     |    |     |    |     |               |     |     |     |     |     |    |     |
| SSA                            | 16              | 100% |    |     | 1  | 6%  |    |     | 1             | 6%  | 1   | 6%  | 3   | 19% |    |     |
| PRRT                           |                 |      | 8  | 50% | 6  | 38% | 11 | 69% | 4             | 25% |     |     | 11  | 69% | 7  | 44% |
| Chemotherapy                   |                 |      | 2  | 13% | 3  | 19% |    |     | 9             | 56% | 5   | 31% |     |     | 7  | 44% |
| TKI                            |                 |      | 5  | 31% | 5  | 31% | 1  | 6%  | 2             | 13% | 10  | 63% |     |     |    |     |
| TACE/SIRT                      |                 |      |    |     | 2  | 13% |    |     |               |     |     |     |     |     |    |     |
| Resection                      |                 |      |    |     |    |     |    |     | 1             | 6%  | 1   | 6%  |     |     | 1  | 6%  |
| OTH                            |                 |      | 1  | 6%  | 2  | 13% | 1  | 6%  | 1             | 6%  | 1   | 6%  |     |     | 2  | 13% |
